# Supplementary material
Source: PubMed Central journal article supplement (PMC4418530)
Supplement: NIHMS672845-supplement-1.pdf [file NIHMS672845-supplement-1.pdf]

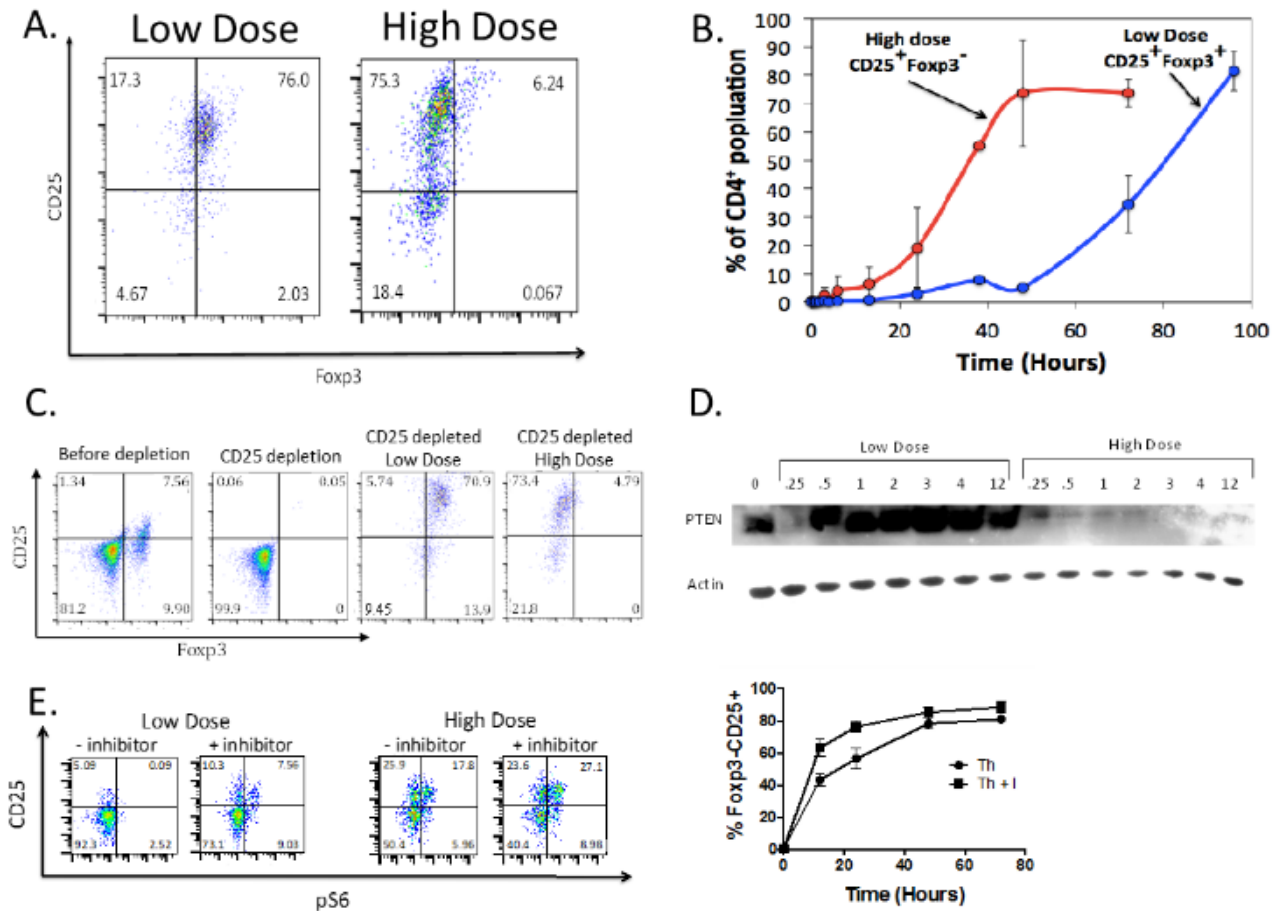

**Figure S1. Low dose stimulation promotes Treg induction, while high dose stimulation promotes Th induction and PTEN inhibition enhances Th induction.**

CD4<sup>+</sup> T cells were stimulated under low and high dose stimulation and gated CD3<sup>+</sup>CD4<sup>+</sup> were stained for Fcpx3 and CD25 after 72 and 96 hours of stimulation (**A and B**). Low dose stimulation yields mostly CD25<sup>+</sup>Fcpx3<sup>+</sup> cells, which are defined as Treg (left panel A). High dose stimulation yielded mostly CD25<sup>+</sup>Fcpx3<sup>-</sup> cells, which are defined at Th (right panel A). (**B**) A time course of Th and Treg development under high (red line) and low (blue line) conditions. Results shown represent the mean  $\pm$  SEM of three similar experiments (**C**) CD25 depletion was performed to remove nTregs from the sample. Flow cytometry of CD25 and Fcpx3 expression on gated CD3<sup>+</sup> CD4<sup>+</sup> T cells before (far left panel) and after (left panel) depletion and following stimulation with low and high dose anti-CD3 (right and far right panels). (**D**) Following CD25 depletion, CD4<sup>+</sup> T cells were activated under low and high dose stimulation and samples were analyzed for total PTEN. The results in C and D are representative of two similar experiments. (**E**) CD4<sup>+</sup> T cells were activated under high and low dose stimulation with or without a PTEN inhibitor (SF1670, 10  $\mu$ M) and gated CD3<sup>+</sup>CD4<sup>+</sup> T cells were stained for pS6 and CD25 to follow activation at twelve hours of activation (left and center panels). High dose stimulation in the presence or absence of PTEN inhibitor resulted in the generation of similar numbers of Th cells (right panel). Results shown represent the mean  $\pm$  SEM of three similar experiments

|    | Logical Rule                                                             | Description and Reference                                                                                                                 |
|----|--------------------------------------------------------------------------|-------------------------------------------------------------------------------------------------------------------------------------------|
| 1  | $TCR' = TCR\_LOW \text{ or } TCR\_HIGH$                                  | TCR signaling can be induced by high or low antigen doses.                                                                                |
| 2  | $CK2' = TCR\_HIGH$                                                       | CK2 is activated under high antigen doses (26)                                                                                            |
| 3  | $MEK1' = TCR$                                                            | MEK1 is activated under both high and low antigen doses (32)                                                                              |
| 4  | $PIP3' = (TCR\_LOW \text{ or } TCR\_HIGH) \text{ and not } PTEN\_active$ | PIP2 is converted to PIP3 under both high and low antigen doses. It is converted back to PIP2 by PTEN catalytic activity                  |
| 5  | $MTORC2' = (TCR\_LOW \text{ or } TCR\_HIGH) \text{ and not } AKT$        | MTORC2 is activated under both high and low antigen doses. It is deactivated through effectors, downstream of AKT (31)                    |
| 6  | $AKT' = PIP3 \text{ and } MTORC2$                                        | AKT is activated in the presence of PIP3 and MTORC2 (11)                                                                                  |
| 7  | $PTEN\_total' = FOXO1 \text{ and not } NEDD4$                            | PTEN levels increase due to transcription by FOXO1 (this paper). PTEN is ubiquitinated by NEDD4, leading to proteasomal degradation (19). |
| 8  | $PTEN\_active' = PTEN\_total \text{ and } MEK1 \text{ and not } CK2$     | PTEN is activated through localization to the membrane induced by MEK1 (30) It is deactivated through phosphorylation by CK2 (25).        |
| 9  | $FOXO1' = \text{not } AKT$                                               | FOXO1 is deactivated through phosphorylation by AKT (27)                                                                                  |
| 10 | $NEDD4' = TCR\_HIGH$                                                     | NEDD4 is activated by TCR signaling.                                                                                                      |

**Figure S2.** Update rules for extended logical model including *FoxO1*. A minimized version of the model as diagrammed in Figure 3E was specified as a Boolean model using the logical rules shown here. These rules are used to determine the next state of each element in the system as a logical function of its inputs, which are binary variables that take the values 0, representing the inactive state, or 1, representing the active state. The logical functions used in the rules are constructed using standard operators such as AND, OR, and NOT. For example, mTORC2 activation is described by the following rule:  $MTORC2' = (TCR\_LOW \text{ or } TCR\_HIGH) \text{ and not } AKT$ , meaning that mTORC2 is activated when either TCR\_LOW or TCR\_HIGH input is present and AKT is inactive. At the initial time of the simulation, all variables are set to inactive except PTEN\_total, FoxO1, and either TCR\_LOW or TCR\_HIGH depending on the stimulation scenario. The system is then allowed to evolve in time according to the General Asynchronous update scheme (15). One simulation unit is the mean firing interval of a single Boolean update rule in the system. For the simulations performed here, the logical rules were translated into the BioNetGen rule-based modeling language using an automated tool called Boolean2BNGL included in the BioNetGen package (14) (<http://bionetgen.org>). Both the Boolean model rules and the derived BioNetGen language file are available online at [http://bionetgen.org/PTEN\\_model](http://bionetgen.org/PTEN_model). The BioNetGen model was using a modified version Gillespie's Direct Stochastic Simulation Algorithm (16). Note: reference numbers refer to the references in the main text.
